# Supplementary material for: Cloning of a Passage-Free SARS-CoV-2 Genome and Mutagenesis Using Red Recombination
Source: MDPI journal article supplement (doi:10.3390/ijms221910188), 2021-09-22
Supplement: s1 [file s1]

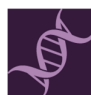

Supplementary Materials

# Cloning of a passage-free SARS-CoV-2 genome and mutagenesis using Red recombination

Alexandra Herrmann <sup>1</sup>, Doris Jungnickl <sup>1</sup>, Arne Cordsmeier<sup>1</sup>, Antonia Sophia Peter<sup>1</sup>, Klaus Überla<sup>1</sup>, and Armin Ensser <sup>1,\*</sup>

**Table S1.** Oligonucleotides used within this study.

| Application                  | Name                  | Sequence (5' → 3')                                                                                                                                                                                                                                                                                                                                                                                                                                                                                                                                                                                                                                                 |
|------------------------------|-----------------------|--------------------------------------------------------------------------------------------------------------------------------------------------------------------------------------------------------------------------------------------------------------------------------------------------------------------------------------------------------------------------------------------------------------------------------------------------------------------------------------------------------------------------------------------------------------------------------------------------------------------------------------------------------------------|
| pLV-EF1a-IRES-Blast-N        | LVfwdN                | gtcgtgaggatccgcacagtggcgccgcccaccatgtctgataatggaccccaaat                                                                                                                                                                                                                                                                                                                                                                                                                                                                                                                                                                                                           |
|                              | LVrevN                | tgctagaggctgatcagcgggtttaaacttaggcctgagttgagtcagcactg                                                                                                                                                                                                                                                                                                                                                                                                                                                                                                                                                                                                              |
| pLV-EF1a-IRES-vector         | LV-IRES-Not-Kozak-Atg | catggtggcgccgcccactgtgcggatcctcacgacactgaaatg                                                                                                                                                                                                                                                                                                                                                                                                                                                                                                                                                                                                                      |
|                              | FLAG-Stop-Pme         | gattacaaggatgacgacgataagttagtttaaaccgctgatcagcctc                                                                                                                                                                                                                                                                                                                                                                                                                                                                                                                                                                                                                  |
| pLV-EF1a-IRES-Blast-ACE2     | LVfwdACE2             | gtcgtgaggatccgcacagtggcgccgcccaccatgtcaagctcttctggctcctt                                                                                                                                                                                                                                                                                                                                                                                                                                                                                                                                                                                                           |
|                              | LVrevACE2             | tgctagaggctgatcagcgggtttaaactaaaaggaggtctgaacatcatca                                                                                                                                                                                                                                                                                                                                                                                                                                                                                                                                                                                                               |
| pLV-EF1a-IRES-Puro-T7RNAP    | T7-LVfwd              | gtcgtgaggatccgcacagtggcgccgcccaccatgaacacgattaacatcgctaag                                                                                                                                                                                                                                                                                                                                                                                                                                                                                                                                                                                                          |
|                              | T7-LVrev              | tgctagaggctgatcagcgggtttaaactcacggaacgcaagtcgactctaag                                                                                                                                                                                                                                                                                                                                                                                                                                                                                                                                                                                                              |
| pLV-EF1a-IRES-Blast-N-3xFLAG | LVfwdN                | gtcgtgaggatccgcacagtggcgccgcccaccatgtctgataatggaccccaaat                                                                                                                                                                                                                                                                                                                                                                                                                                                                                                                                                                                                           |
|                              | asFLAGtag             | cttatcgtcgtcatccttgtaac                                                                                                                                                                                                                                                                                                                                                                                                                                                                                                                                                                                                                                            |
| Gene blocks (IDT)            | Gaussia Luc           | atgggagtcacaaagtctgttgcctgatctgcatcgctgtggccgaggccaagcccaccgagaacaacgaagacttcaacatcgtggccgtggccagcaacttcgcgaccacgcatctgatgtgacgcgggaagttgcccggaagaagctgccgtggagggtgctcaaagagatggaagccaatgccggaaagctggctgcaccaggggtgctgtgatctgctgtcccatcaagtgcagcccaagatgaagaagtccacgagcgtgccacacctcaagaaggcgacaagagtcgcacagggcgcataggcgaggcgtcgtcgacattcctgagattcctgggttcaaggactggagccatggagcagttcatgcacaggtcgatctgtgtgtgactgcacactggctgcctcaaagggttccaacgtgcagtgttctgacctgctcaagaagtggctgccgcaacgctgtgcgaccttgcagcaagatccaggggcagggtggacaagatcaagggggccgggtggtgactaa                                                                                                              |
|                              | CoVends-PacI          | ttaaaggttataacctcccaggtaacaaccaaccaacttgcgtcttctgatctgttctctaaacgaactttaaactctgttggtgtgactcggctgcatgcttagtcactcacgcagtataataactaattactgtcgttgacaggacacagtaactcgtctatctctgcaggctgcttaccggttctcgtgtgtgagccgatcatcagcacatctagggttctccgggtgtgacggaaggtaagatggagagcctgtcctggttcaacgagaaaaacacgcgtcaactcagtttgctgtttacaggttcgcgacgtgctgctacgttaattaatgggctatataaacgttttctgtttcgtttacgatatagtctacttctgtgcagaatgaattctgtaactacatagcacaagtagatgtagtttaacttcaatcatagcaatctttaaactcagtggttaacattaggaggagactgaaagagccaccacatttaccagagggcagcgaggtacgatcgagtgacagtgaacaatgtagggagagctgctatatggaagagccctaagtgtgtaaaataatttagtagtgctatccccatgtgattttaaagcttcttaggagaatgacaaaaaaaaa |
| Cloning                      | BeloCMV-F             | cattatacgaagtattatcgtatgcggccgctagtaataacacgggtcattag                                                                                                                                                                                                                                                                                                                                                                                                                                                                                                                                                                                                              |
| pBeloCoV                     | CMV-T7-CoV-R          | cctgggaaggatataaacctttaaactccctatagtgagtcgtattaat                                                                                                                                                                                                                                                                                                                                                                                                                                                                                                                                                                                                                  |

|                      |                        |                                                                                                                 |
|----------------------|------------------------|-----------------------------------------------------------------------------------------------------------------|
|                      | bGHPA-Belo-F           | tctagttgccagccatctgtgtt                                                                                         |
|                      | bGHPA-Belo-R           | atgagaattggtcgacggccggcgccgccccctagagccccagctggttcttc                                                           |
|                      | HDV Ribozyme           | ggccggcatgggtccagcctcctcgctggcgccgctgggcaacattccgaggggaccgtccctcggtaatggcgaatgggac                              |
|                      | Linking-pA-F           | cttaggagaatgacaaaaaaaaaaaaaaaaaaaaaaaaaaaaagccggcatggtcc                                                        |
|                      | Linking-pA-R           | ggaccatgccggcctttttttttttttttttttttttttttttgtcattctcctaag                                                       |
| Fragment 1           | 326-Fwd                | ttacaggttcgcgacgtgctcgtacgtggcttggagactccgtggag                                                                 |
|                      | 7150-Rev               | taaaccactaagacaactacaagg                                                                                        |
| Fragment 2           | 7127-Fwd               | tgtagtgtttgtcttagtggttag                                                                                        |
|                      | 13975-Rev              | ctaagttggcgtatacgcgtaatatatc                                                                                    |
| Fragment 3           | 13959fwd               | cgtatacgccaacttagtgaaac                                                                                         |
|                      | 21192-Rev              | agcattccaagaatgttctgttat                                                                                        |
| Fragment 4           | 21169-Fwd              | ataacagaacattcttgaatgct                                                                                         |
|                      | 29581-ORF10-Rev        | agcgaaaacgtttatatagccccatctg                                                                                    |
| Insertion fragment 2 | 7107fwd-recAsc         | actgtactggttctatactttagtgtttgtcttagtggttaggcgcgccaaccaattaaccaattctgattag                                       |
|                      | 13934fwd-recAsc        | ttgtagaaaaccagatatattacgcgtatacgcgaacttagtggcgcgccaaccaattaaccaattctgattag                                      |
| N-3xFLAG             | N3F-in-Fwd             | tccaaacaattgcaacaatccatgagcagtgctgactcaactcaggccgactacaaggaccacgatggtg                                          |
|                      | N3F-in-Rev             | aacgtttatatagccccatctgccttgtgtggtctgcatgagttacttatcgtcgtcatccttgtaatcgatgcatgatctttataacaacaattaaccaattctgattag |
| d7-GLuc              | GLuc-dORF7a-Fwd        | aatggagattgattaacgaacatgggagtcgaagtctgtttgcc                                                                    |
|                      | GLuc-dORF7a-Rev        | gaagtcaattaatgaaagttcaatcagtcaccaccggccccctgac                                                                  |
|                      | 27351fwd-recSac-dORF7a | tcaattagatgaagagcaaccaatggagattgattaacgaacatgcccggaaccaattaaccaattctgattag                                      |
|                      | 27801rev-recSac-dORF7a | aggctaaaaagcacaatagaagtcattaatgaaagttcaatcaccgcggaggatgacgacgataagtaggg                                         |
| d7-GFP               | EGFP-dORF7a-Fwd        | atggagattgattaacgaacatgggtgagcaagggcgaggag                                                                      |
|                      | EGFP-dORF7a-Rev        | agtcaattaatgaaagttcaatcactgtacagctcgtccatgccg                                                                   |
|                      | 27351fwd-recSac-dORF7a | tcaattagatgaagagcaaccaatggagattgattaacgaacatgcccggaaccaattaaccaattctgattag                                      |
|                      | 27801rev-recSac-dORF7a | aggctaaaaagcacaatagaagtcattaatgaaagttcaatcaccgcggaggatgacgacgataagtaggg                                         |
| d8-GLuc              | 27849fwd-recSac        | cttgaactgcaagatcataatgaaactgtcacgcctaaacgaaccgcggaaccaattaaccaattctgattag                                       |
|                      | 28493rev-recSac        | gctgattttggggtccattatcagacatttttagttgttcgtttaccgcggaggatgacgacgataagtaggg                                       |
| d8-GFP               | d8-univFP-F            | gaaactgtcacgcctaaacgaacatgggtgagcaagggcgaggag                                                                   |
|                      | d8-univFP-R            | ggtccattatcagacatttttagttgttcgtttactgtacagctcgtccatgccg                                                         |
|                      | 27849fwd-recSac        | cttgaactgcaagatcataatgaaactgtcacgcctaaacgaaccgcggaaccaattaaccaattctgattag                                       |
|                      | 28493rev-recSac        | gctgattttggggtccattatcagacatttttagttgttcgtttaccgcggaggatgacgacgataagtaggg                                       |
| d6-YFP               | Yin-d6fwd              | gcagtgacaatattgtctgttacagtaagtacaacagatggtgagcaagggcgaggagctg                                                   |
|                      | Yin-d6rev              | gagtgttatcagtgccaagaaaagaataattttcatgttcgtttactgtacagctcgtccatgccgag                                            |
| after8-YFP           | Yin-after8             | gagtatcatgacgttcgtgtgttttagattttcatctaaacgaacatggtgagcaagggcgaggagctg                                           |

|         |                                   |                                                                       |
|---------|-----------------------------------|-----------------------------------------------------------------------|
|         | 29531-Nend-EYFP-KanRP             | aacgtttatatagcccatctgccttggtgtggtctgcatgagtttactgtacagctcgtccatgccgag |
| RT-qPCR | RdRp_fwd_nondeg                   | gtgaaatggtcatgtgtggcgg                                                |
|         | RdRp_rev_nondeg                   | caaatgttaaaacactattagcata                                             |
|         | RdRp-probe<br>VIC-BMN-Q535        | caggtggaacctcatcaggagatgc                                             |
|         | sgGLuc-rev                        | cgatgttgaagtcttcgttgtt                                                |
|         | sgYFP-rev                         | agctcgaccaggatgggcac                                                  |
|         | WHS-00025F                        | ccaaccaacttcgatctcttgta                                               |
|         | sgYFP-probe<br>6-FAM/ZEN/3' IBFQ  | accccggtgaacagctcctcgccct                                             |
|         | sgGLuc-probe<br>6-FAM/ZEN/3' IBFQ | tcggtgggcttgccctcgccaca                                               |

Oligonucleotides were synthesized by IDT, Biomers, or ThermoFisher. Long oligonucleotides (>50 nt) were purchased as Ultramer™ DNA Oligonucleotides (IDT).

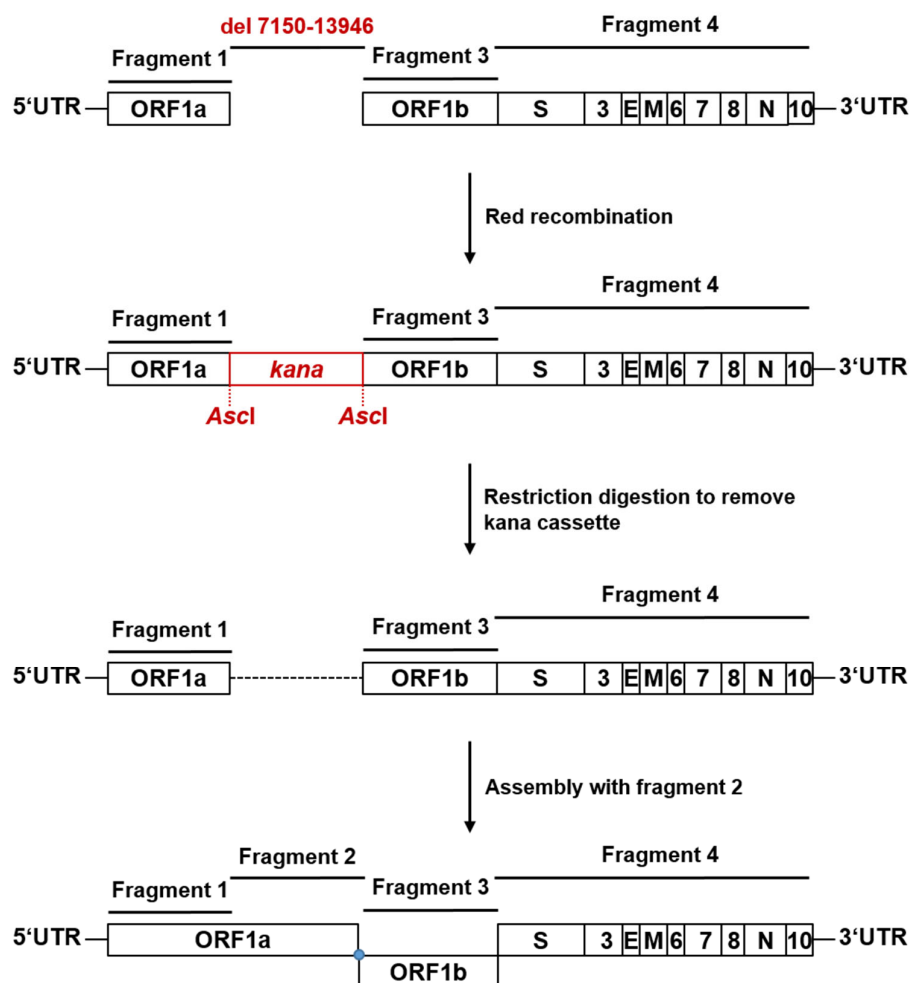

**Figure S1.** Schematic depiction of the complementation of pBSCo2 using Red recombination and assembly. A clone that lacked fragment 2 (deletion between nt 7150 to 13946), was used to generate the full-length bacmid pBSCoV2 BAC by Red recombination. A kanamycin (*kana*) resistance cassette with short sequence duplications to the site of deletion with flanking *AscI* sites was inserted by recombination. After confirmation of correct clones, the *kana* cassette was removed by restriction digestion with *AscI* and the missing fragment 2 was assembled with the digested linear backbone and transformed into *E.coli* GS1783, resulting in full-length pBSCoV2 clones.

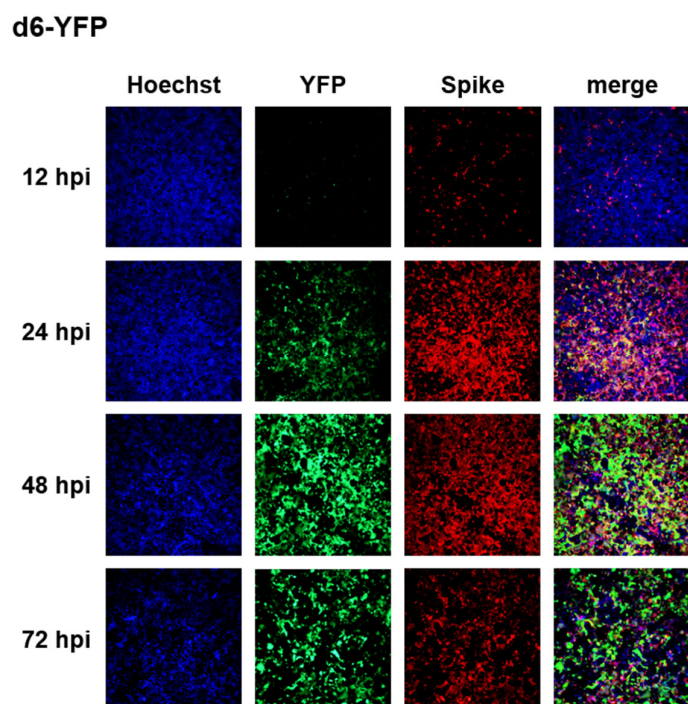

**Figure S2.** Visualization of d6-YFP reporter expression. CaCo-2 cells were infected with recSARS-CoV-2 d6-YFP (MOI = 0.005) and fixed at 12, 24, 48, and 72 hours post infection (hpi). Cells were immunostained with mAb against spike (red) and visualized for reporter expression (green). Hoechst 33342 was used for nuclear staining (blue). Imaging was performed with an ImmunoSpot Image Analyzer.

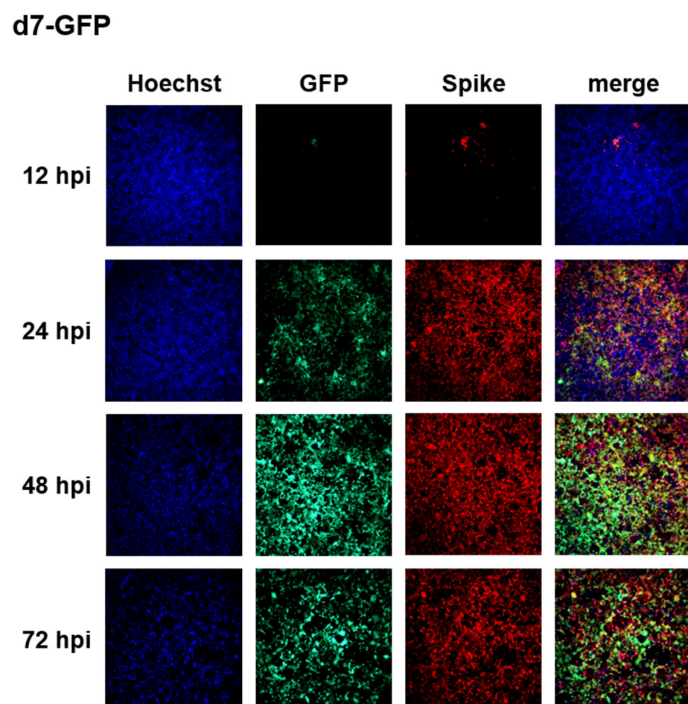

**Figure S3.** Visualization of d7-GFP reporter expression. CaCo-2 cells were infected with recSARS-CoV-2 d7-GFP (MOI = 0.005) and fixed at 12, 24, 48, and 72 hours post infection (hpi). Cells were immunostained with mAb against spike (red) and visualized for reporter expression (green). Hoechst 33342 was used for nuclear staining (blue). Imaging was performed with an ImmunoSpot Image Analyzer.

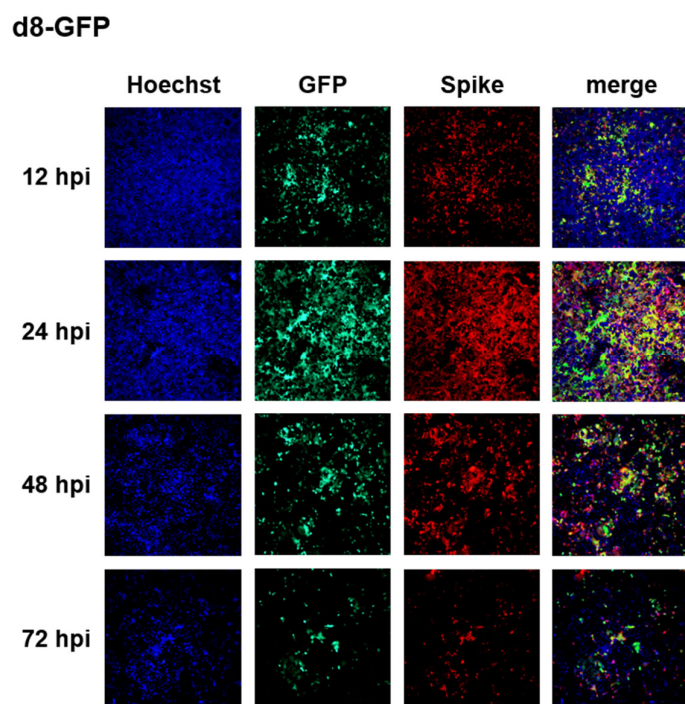

**Figure S4. Visualization of d8-GFP reporter expression.** CaCo-2 cells were infected with recSARS-CoV-2 d8-GFP (MOI = 0.005) and fixed at 12, 24, 48, and 72 hours post infection (hpi). Cells were immunostained with mAb against spike (red) and visualized for reporter expression (green). Hoechst 33342 was used for nuclear staining (blue). Imaging was performed with an ImmunoSpot Image Analyzer.

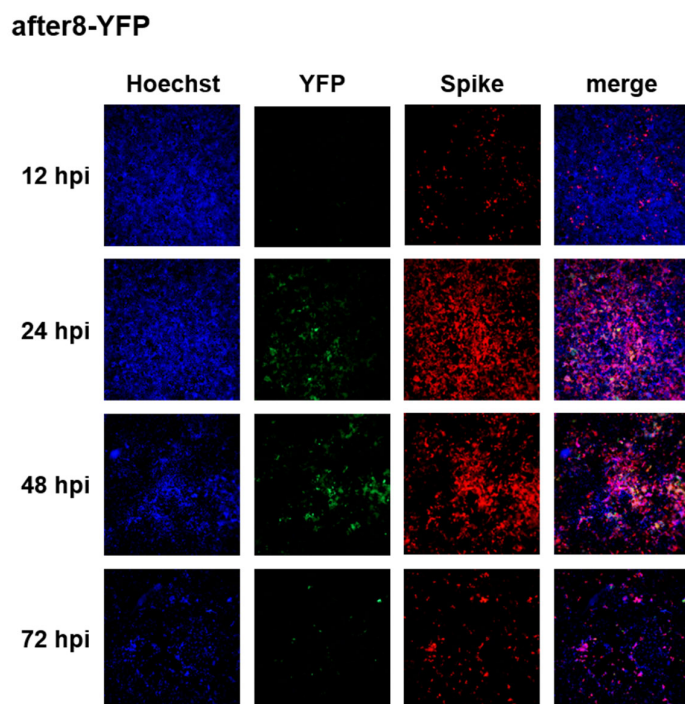

**Figure S5. Visualization of after8-YFP reporter expression.** CaCo-2 cells were infected with recSARS-CoV-2 after8-YFP (MOI = 0.005) and fixed at 12, 24, 48, and 72 hours post infection (hpi). Cells were immunostained with mAb against spike (red) and visualized for reporter expression (green). Hoechst 33342 was used for nuclear staining (blue). Imaging was performed with an ImmunoSpot Image Analyzer.

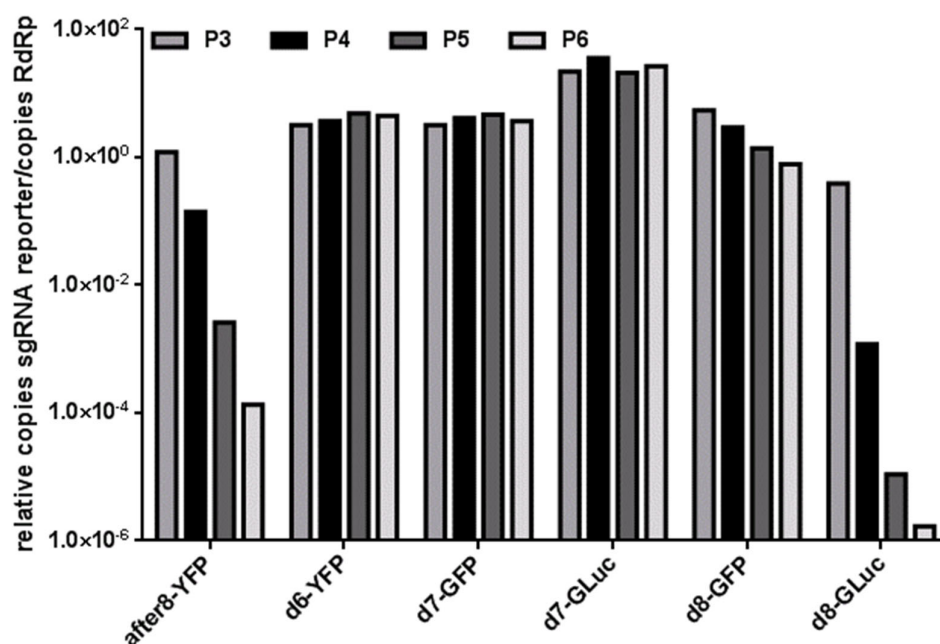

**Figure S6. Reporter stability.** CaCo-2 cells were infected with different reporter viruses. Passage (P) 2 virus stocks were further passaged on CaCo-2 cells for two days per passage. Total RNAs of infected cells were extracted from each passage. Presence of subgenomic reporter and genomic RNA (RdRp) was measured via RT-qPCR using specific probes. Ct values of reporter RNAs were normalized on viral load by RdRp Ct values. A representative experiment out of three independent experiments with similar results is shown.

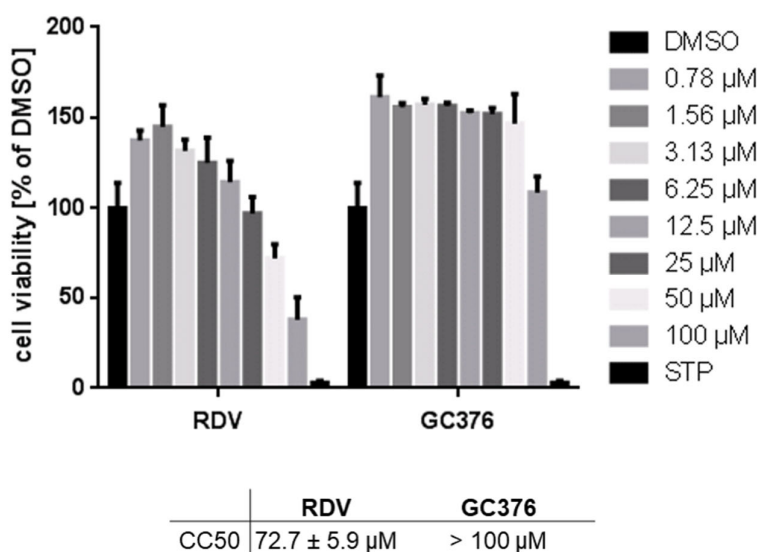

**Figure S7. Cytotoxicity assay.** Compound toxicities of Remdesivir (RDV) and GC376 were determined by Neutral Red Assay. CaCo-2 cells were incubated with the indicated concentrations for 3 days. Staurosporine (STP) at 10 μM served as control. The percentage of viable cells was calculated relative to DMSO-treated cells. Mean values of triplicates ± SD are shown.
